# Supplementary material for: Detecting differentially methylated loci for multiple treatments based on high-throughput methylation data
Source: PubMed Central journal article supplement (PMC4026834; doi:10.1186/1471-2105-15-142), 2014-05-15
Supplement: 1471-2105-15-142-S2.pdf [file 1471-2105-15-142-S2.pdf]

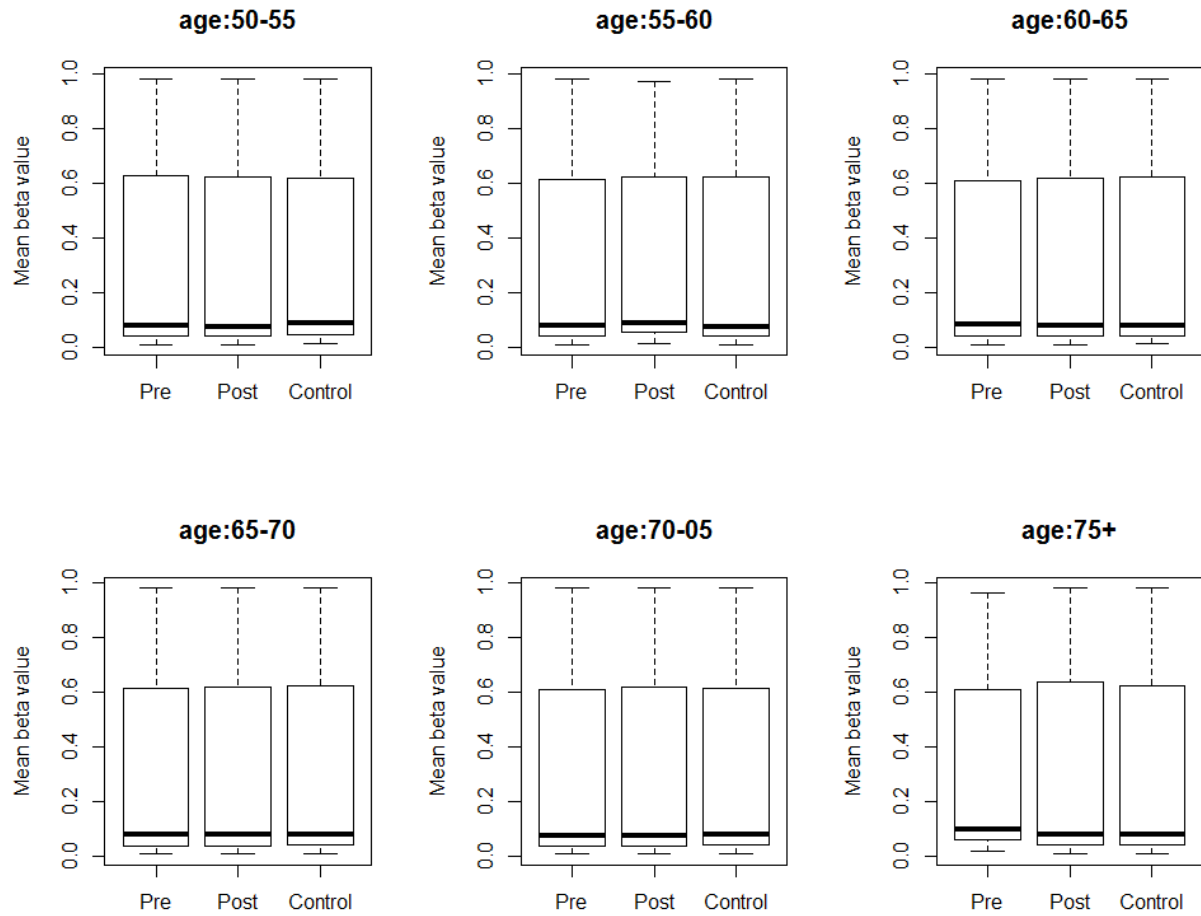

**Supplementary Figure 1.** The mean  $\beta$ -value of loci with p-value greater than  $10^{-3}$  from the proposed test over the three treatment groups by the age group. For each age group, there is no obvious trend over the three treatments for the  $\beta$ -value.
